# Supplementary material
Source: PubMed Central journal article supplement (PMC6939872)
Supplement: NIHMS1545117-supplement-1.pdf [file NIHMS1545117-supplement-1.pdf]

**Figure S1**

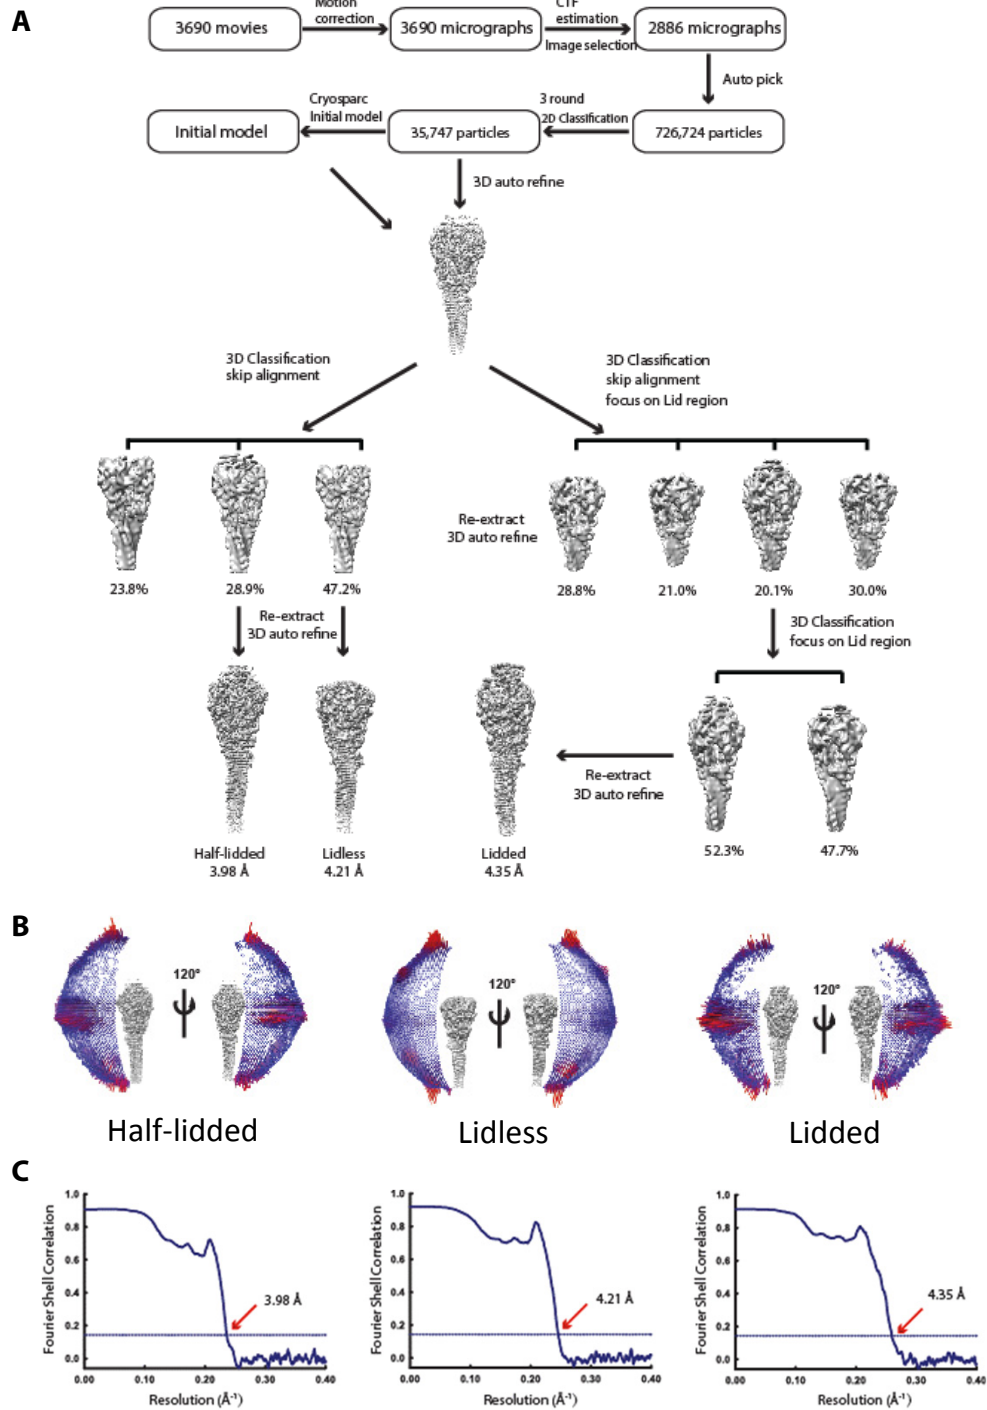

**Figure S1. Related to Figure 1. Structure determination of the PdpA-VgrG complex**

(A) Workflow of image processing, 3D reconstruction and structure refinement.

(B) Angular distribution of all particles used for reconstruction of each of the 3 maps of the PdpA-VgrG complex.

(C) Fourier shell correction coefficient as function of spatial frequency showing the resolutions for the final reconstructions of the PdpA-VgrG half-lidless, lidless and lidless complexes to be 3.98, 4.21 and 4.35 Å, respectively.

**Figure S2**

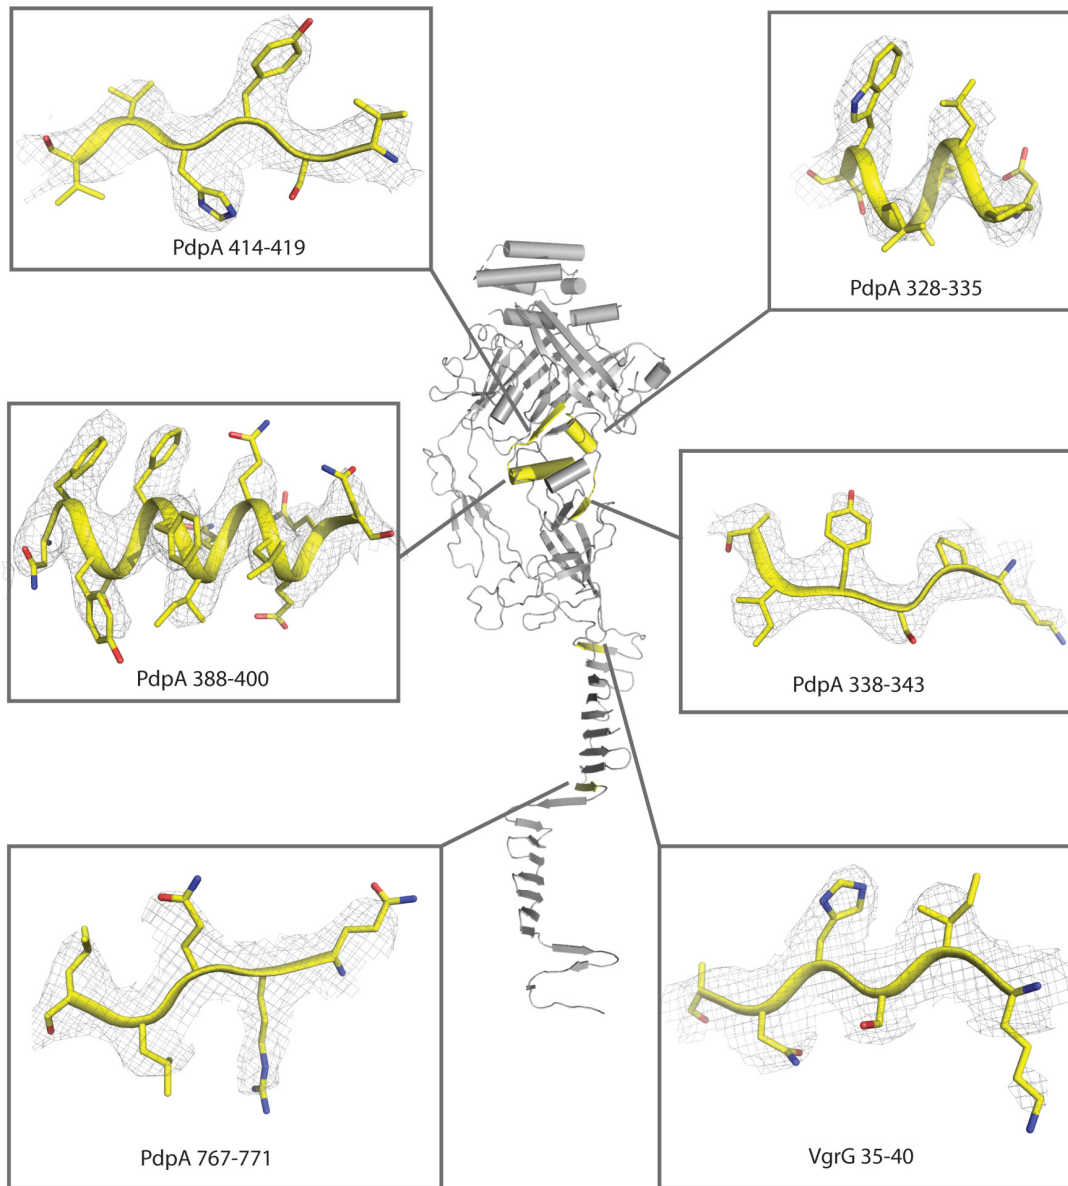

**Figure S2. Related to Figure 1. Representative cryoEM density maps (grey mesh) superposed with our atomic model (ribbon and sticks) for various parts of the PdpA-VgrG complex. The atomic model is shown in the middle as a ribbon diagram.**

**Figure S3**

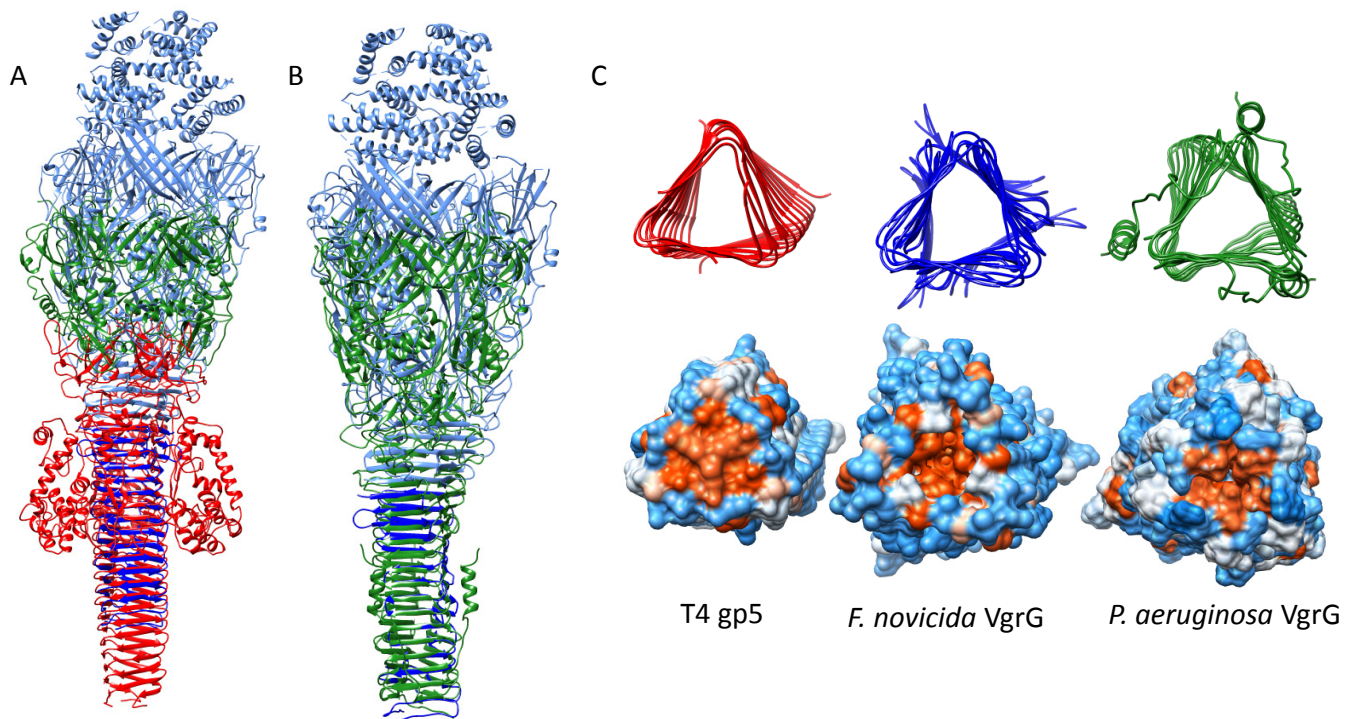

**Figure S3. Related to Figure 1. Comparison of central spike structures.**

(A) Ribbon diagrams of T4 gp27 (green) and gp5 (red) superposed on lidded *F. novicida* PdpA (light blue) and VgrG (dark blue).

(B) *P. aeruginosa* VgrG (green) superposed on lidded PdpA (light blue) and VgrG (dark blue).

(C) Ribbon (top) and hydrophobicity surface views (bottom) of the C-terminus of T4 gp5, *F. novicida* VgrG, and *P. aeruginosa* VgrG. Colors in the top ribbon diagrams are as in panels (A) and (B). In the hydrophobicity surface views, the most hydrophobic surfaces are shown in red and the most hydrophilic surface are shown in blue. T4 gp5 and gp27 structures are from pdb 2Z6B (Koshiyama *et. al.*, 2008) and *P. aeruginosa* VgrG structure is from pdb 6H3L (Quentin *et al.*, 2018).

## Figure S4

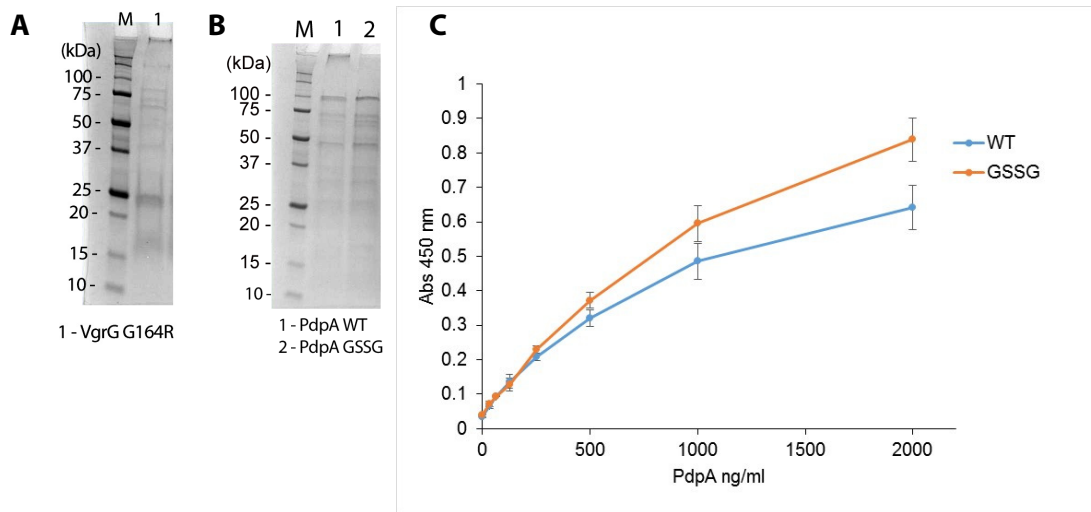

### Figure S4. Related to Figure 6. Interactions of recombinant FLAG-VgrG G164R and PdpA.

(A) Histidine (His)- and FLAG-epitopes tagged VgrG G164R was expressed and purified from *E. coli* by Ni-NTA affinity chromatography and evaluated by SDS-PAGE and Coomassie protein staining.

(B) His-epitope tagged PdpA and PdpA::GSSG were expressed and purified from *E. coli* by Ni-NTA affinity chromatography and evaluated by Coomassie protein staining.

(C) Interaction of purified recombinant FLAG-VgrG G164R and His-tagged PdpA and PdpA::GSSG. ELISA plate wells were coated with His-tagged PdpA or PdpA::GSSG (0-2  $\mu\text{g/ml}$ ); blocked with BSA and gelatin; incubated with purified FLAG-VgrG (0.1  $\mu\text{g/ml}$ ); and binding evaluated by incubation with HRP-conjugated mouse anti-FLAG M2 monoclonal antibody and peroxidase substrate. Data shown are means  $\pm$  s.e. of duplicates. The experiment was conducted twice with similar results.

**Table S1. Related to Figure 1. Most abundant proteins identified by Mass Spectrometry**

| <b>Gene Product Identified</b>    | <b>Accession Number</b> | <b>Relative Abundance</b> | <b>Sequence Count</b> | <b>Spectrum Count</b> | <b>Coverage</b> | <b>MW (Da)</b> | <b>NSAF*</b> |
|-----------------------------------|-------------------------|---------------------------|-----------------------|-----------------------|-----------------|----------------|--------------|
| VgrG FPI                          | A0Q7H3                  | 1.000                     | 20                    | 874                   | 68.9%           | 17472          | 0.300        |
| PdpA                              | A0Q7H0                  | 0.672                     | 150                   | 2935                  | 82.0%           | 95345          | 0.202        |
| VgrG of FNI                       | A0Q3Y4                  | 0.301                     | 5                     | 151                   | 81.9%           | 10412          | 0.091        |
| Acetyl-CoA carboxylase            | A0Q5E3                  | 0.150                     | 8                     | 128                   | 66.2%           | 16659          | 0.045        |
| 60 kDa chaperonin                 | A0Q838                  | 0.048                     | 33                    | 139                   | 49.1%           | 57317          | 0.014        |
| 30S ribosomal protein S10         | A0Q4I2                  | 0.036                     | 11                    | 20                    | 53.3%           | 11924          | 0.011        |
| Pyruvate dehydrogenase            | A0Q7Z6                  | 0.029                     | 58                    | 138                   | 53.6%           | 100182         | 0.009        |
| Major outer membrane protein      | A0Q7V4                  | 0.023                     | 11                    | 22                    | 56.7%           | 19786          | 0.007        |
| Uncharacterized Protein, FTN_0041 | A0Q3Y7                  | 0.021                     | 33                    | 82                    | 41.5%           | 85456          | 0.006        |
| IgIC                              | A0Q7I3                  | 0.020                     | 9                     | 22                    | 44.0%           | 22133          | 0.006        |

\*Normalized spectral abundance factor. The experiment was conducted twice on separate biological samples with similar results.

**Table S2. Related to Figure 1.**  
**CryoEM data collection and refinement statistics**

| <b>Data Collection</b>                          | <b>Half-lidded</b> | <b>Lidded</b>                | <b>Lidless</b> |
|-------------------------------------------------|--------------------|------------------------------|----------------|
| EM equipment                                    |                    | FEI Titan Krios              |                |
| Voltage (kV)                                    |                    | 300                          |                |
| Detector                                        |                    | Gatan K2                     |                |
| Pixel size (Å)                                  |                    | 1.07                         |                |
| Electron Dose (e <sup>-</sup> /Å <sup>2</sup> ) |                    | 46.65                        |                |
| Defocus range (μm)                              |                    | -2.5~-1.5                    |                |
| <b>Reconstruction</b>                           |                    |                              |                |
| Software                                        |                    | Relion 2.1                   |                |
| Number of used particles                        | 10343              | 3765                         | 16648          |
| Accuracy of rotation (°)                        | 1.735              | 1.683                        | 1.922          |
| Accuracy of translation (pixels)                | 0.729              | 0.743                        | 0.789          |
| Map sharpening B-factors (Å <sup>2</sup> )      | -150               | -150                         | -150           |
| Final Resolution (Å)                            | 3.98               | 4.35                         | 4.21           |
| <b>Model Building</b>                           |                    |                              |                |
| Software                                        |                    | COOT                         |                |
| <b>Refinement</b>                               |                    |                              |                |
| Software                                        |                    | PHENIX real_space_refinement |                |
| Resolution (Å)                                  | 3.98               | 4.35                         | 4.21           |
| Model composition                               |                    |                              |                |
| Protein Residues                                | 2355               | 2550                         | 2148           |
| <b>Validation</b>                               |                    |                              |                |
| RMS deviation                                   |                    |                              |                |
| Bonds Length (Å)                                | 0.005              | 0.009                        | 0.009          |
| Bonds angle (°)                                 | 1.0                | 1.1                          | 1.3            |
| Ramachandran plot statistics (%)                |                    |                              |                |
| Favorite                                        | 87.74              | 86.57                        | 85.94          |
| Allowed                                         | 12.26              | 13.43                        | 14.06          |
| Outlier                                         | 0                  | 0                            | 0              |
| Rotamer outliers (%)                            | 0                  | 0.15                         | 0              |
| C-beta outliers (%)                             | 0                  | 0                            | 0              |
| Mean isotropic B                                | 56.84              | 113.24                       | 56.72          |
| MolProbity score                                | 1.91               | 2.05                         | 1.96           |
